# Supplementary material
Source: Springer Nature journal article supplement (https://www.springermedizin.de/resource/supplementary/12937_2009_276_MOESM4_ESM.pdf/25654766)

### Panel A. Main Sources of DHA (22:6n-3) in diets of school age boys

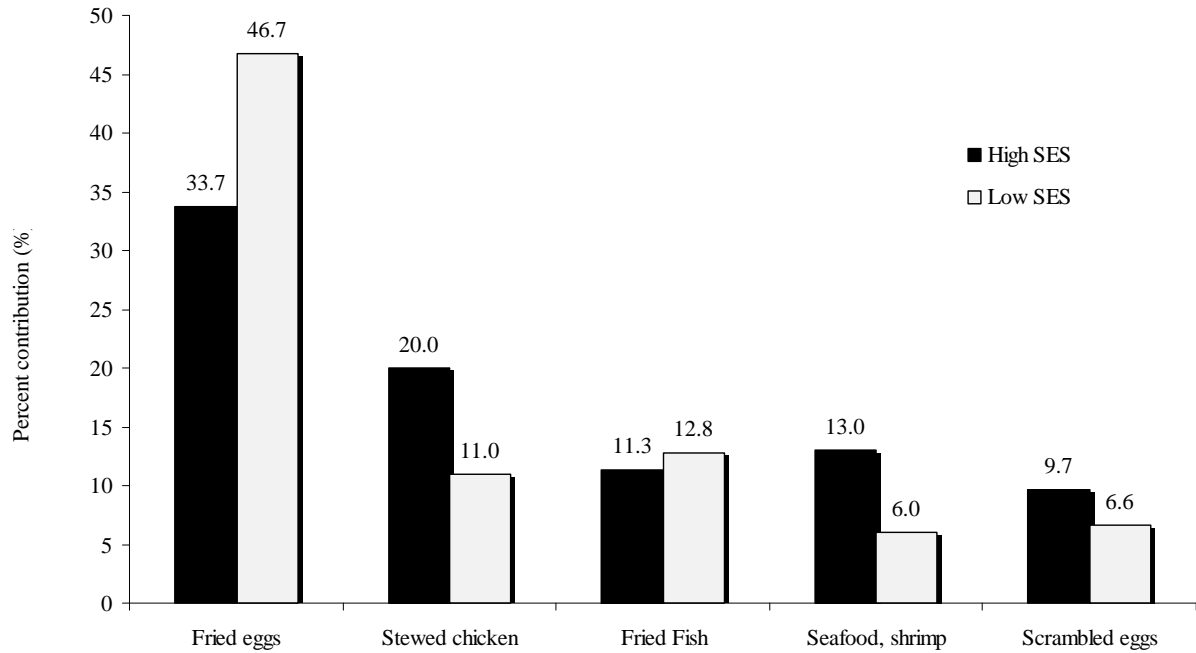

### Panel B. Main Sources of DHA (22:6n-3) in diets of school age girls

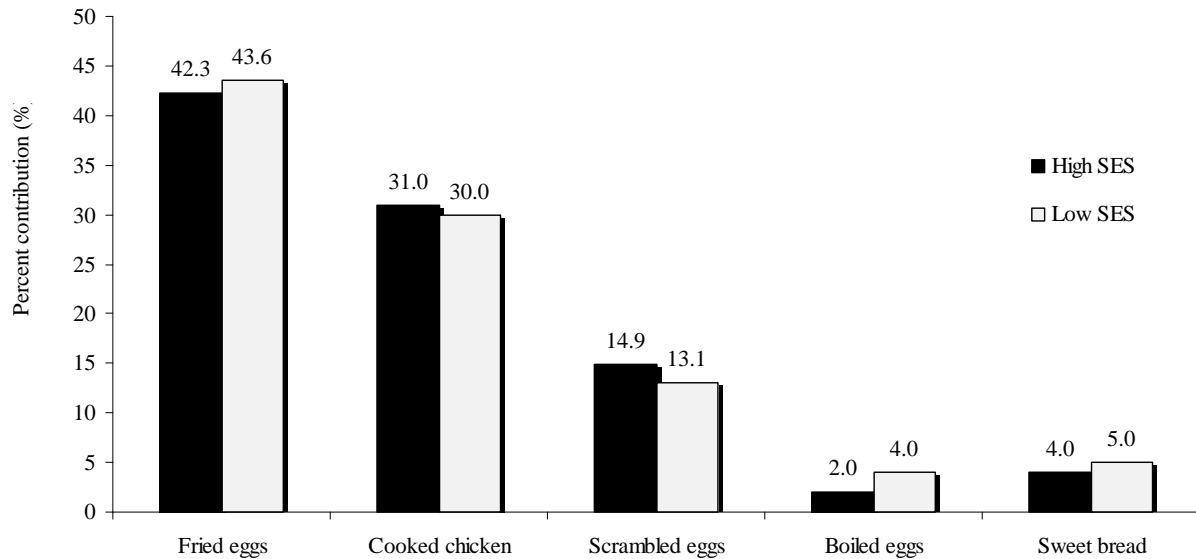

Supplement: MOESM4 [file 25654766]
